# Supplementary material for: Antibody Profiling: Kinetics with Native Biomarkers for Diagnostic Assay and Drug Developments
Source: MDPI journal article supplement (doi:10.3390/bios13121030), 2023-12-14
Supplement: s1 [file s1]

# Antibody Profiling: Kinetics with Native Biomarkers for Diagnostic Assay and Drug Developments

Ute Jucknischke \*, Sebastian Friebe, Markus Rehle, Laura Quast and Sven H. Schmidt \*

Diagnostic Solutions, Reagent Research and Design, Department Antibody and Protein Technologies, (DSRRA) at Roche Diagnostics GmbH, Nonnenwald 2, 82377 Penzberg, Germany

\* Correspondence: ute.jucknischke@roche.com (U.J.); sven\_h.schmidt@roche.com (S.H.S.)

## S.1 Affinity vs. avidity

Triggering receptor expressed on myeloid cells-1 is a transmembrane receptor expressed by innate immune cells, including endothelial cells and platelets. Its released soluble factor sTREM-1 serves as a biomarker related to sepsis.

We compared the impact of avidity-burdened bivalent vs. monovalent binding on the complex half-life time for antibody Anti-sTREM-1 binding to surface-displayed sTREM-1, using a Fab and the IgG-format of the parental antibody as 2<sup>nd</sup> binder. With the stated assay protocol, see Section 2, we used a primary antibody with a fast association rate constant  $k_a > 2.0 \times 10^5 \text{ M}^{-1}\text{s}^{-1}$  and a sufficiently high complex half-life time >115 min, measured at 37°C.

The kinetic profiles for monovalent binding Fab show a detectable dissociation with complex-half-life times  $t/2 \text{ diss}$  between 26–47 min, when binding to recombinant, native or LPS-stimulated sTREM-1, see Figure S1 and Table S1. The interactions obey the Langmuir law. No significant difference occurred for the analyzed differing sTREM-1 sources, recombinant, native or LPS-stimulated sTREM-1. The avidity-burdened binding of the bivalent binding IgG shows a significantly slowed down dissociation with half-life times  $t/2 \text{ diss} > 460 \text{ min}$ . Interestingly, the interaction shows a complex binding behavior, not observed for the monovalent Fab-binding. Therefore, only the dissociation phase was evaluated using the Langmuir dissociation fit. Approximately factor 2 deviating sTREM-1 densities, indicated by the achieved maximum binding response of the 2<sup>nd</sup> binder  $R_{\text{max}}$  between 17 RU and 42 RU reveals high enough density to enable bivalent binding to neighbored sTREM-1.

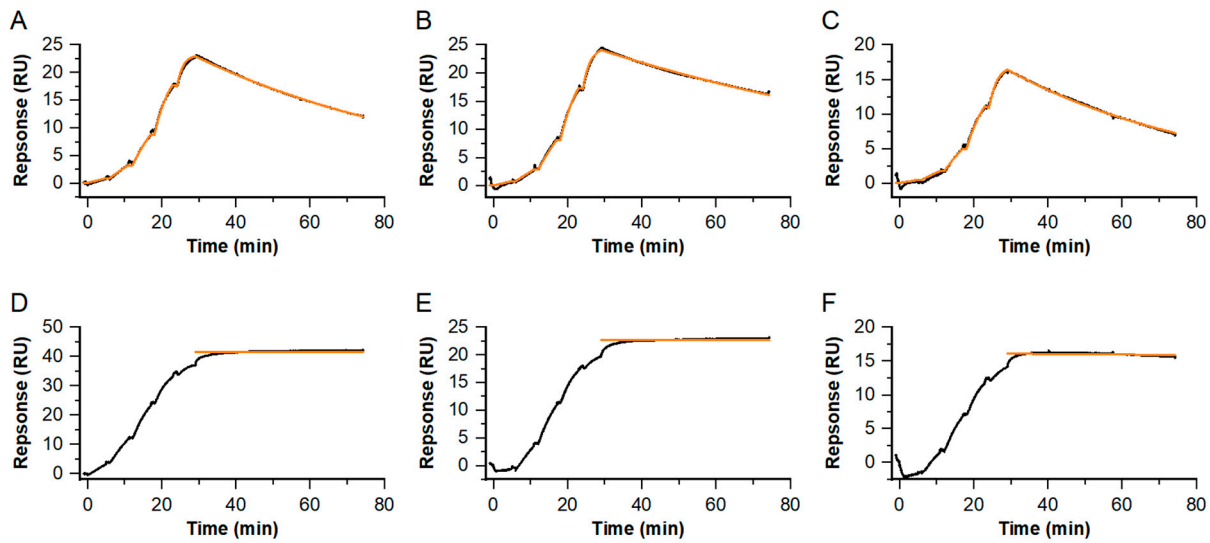

**Figure S1.** Single cycle kinetics for surface displayed sTREM-1 binding to Fab and its parental IgG antibody at 25°C; A series of five consecutive injections of the Fab or IgG Antibody was applied with concentration  $c = 1.5, 4.4, 13.3, 40, 120$  nM; (A)–(C) Binding signatures for Fab binding to (A) recombinant sTREM-1 (B) native sTREM-1 from indented use-study (C) LPS-stimulated sTREM1 (black), with overlaid Langmuir 1:1 Fit (orange); (D)–(F) Binding signatures for parental IgG-antibody binding to (D) recombinant sTREM-1 (E) native sTREM-1 from indented use-study (F) LPS-stimulated sTREM1, depicted black, overlaid with the dissociation Fit (orange).

**Table S1.** Kinetic constants and affinities or avidities for a Fab and IgG Antibody binding to surface-displayed sTREM-1 of different sources. SE - Standard error of mean of the SPR-fit in comparison to the measured data points.

| 2nd binder   | sTREM-1 origin          | $k_a$<br>[M <sup>-1</sup> s <sup>-1</sup> ] | $\pm$ SE( $k_a$ )<br>[M <sup>-1</sup> s <sup>-1</sup> ] | $k_d$<br>[s <sup>-1</sup> ] | $\pm$ SE( $k_d$ )<br>[s <sup>-1</sup> ] | t/2 diss<br>[min] | $K_D$<br>[M]         | Rmax<br>[RU] | U-Value |
|--------------|-------------------------|---------------------------------------------|---------------------------------------------------------|-----------------------------|-----------------------------------------|-------------------|----------------------|--------------|---------|
| Fab          | recombinant             | $8.8 \times 10^4$                           | $2.4 \times 10^2$                                       | $2.5 \times 10^{-4}$        | $<1.0 \times 10^{-5}$                   | 47                | $2.8 \times 10^{-9}$ | 23           | 1       |
| Fab          | native                  | $5.9 \times 10^4$                           | $5.4 \times 10^2$                                       | $4.5 \times 10^{-4}$        | $<1.0 \times 10^{-5}$                   | 26                | $7.6 \times 10^{-9}$ | 15           | 37      |
| Fab          | native - LPS-stimulated | $6.3 \times 10^4$                           | $1.3 \times 10^2$                                       | $3.0 \times 10^{-4}$        | $<1.0 \times 10^{-5}$                   | 38                | $4.8 \times 10^{-9}$ | 18           | 1       |
| IgG-antibody | recombinant             | n.d.                                        | n.d.                                                    | $<2.5 \times 10^{-5}$       | $<1.0 \times 10^{-5}$                   | >460              | n.d.                 | 44           | n.d.    |
| IgG-antibody | native                  | n.d.                                        | n.d.                                                    | $<2.5 \times 10^{-5}$       | $<1.0 \times 10^{-5}$                   | >460              | n.d.                 | 22           | n.d.    |
| IgG-antibody | native - LPS-stimulated | n.d.                                        | n.d.                                                    | $<2.5 \times 10^{-5}$       | $<1.0 \times 10^{-5}$                   | >460              | n.d.                 | 16           | n.d.    |

## S.2 Negative controls for Single Cycle Kinetics

During the experiments negative controls were analyzed, when determining the kinetic properties for antibodies binding to native, soluble biomarkers GDF15, NFL or sTREM-1.

Instead of the target-enrichment, buffer injections were performed, thus enabling the monitoring of possible non-specific binding of the 2<sup>nd</sup> binder to the primary antibody or the sensor-surface.

Additionally, the negative controls without a primary antibody present were monitored, subsequently to the native target-injection.

No significant binding is detectable, when, for example, Anti-GDF15-Fab B is injected as 2<sup>nd</sup> binder, subsequently to the native GDF15-injections without a primary antibody being captured via the surface-displayed capture system, see Figure S2.

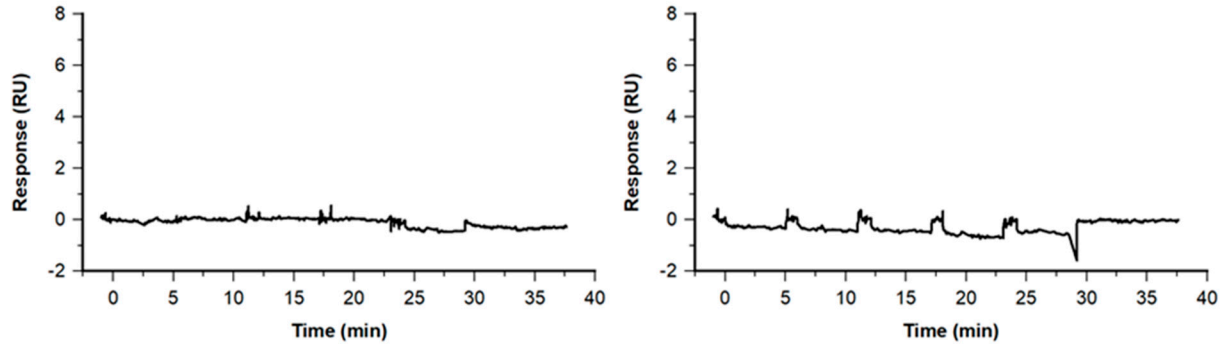

**Figure S2.** The negative control for 2<sup>nd</sup> binder Anti-GDF15 Fab native GDF15 without the primary antibody shows no binding and behaves buffer-like.

The controls with buffer injections instead of the 2<sup>nd</sup> binder, subsequently to the native target-enrichment via the primary antibody were used as blanks for the double-referencing as stated, see section 4.1 Fig 3.

### S3 Small study binding constants

To further investigate the comparability between different sources of GDF15 we started a small study to determine the kinetic constants for three donors (N=3) from each source except for the healthy control (N=1). Each donor sample was measured as a technical duplicate. The resulting mean-values for  $k_a$ ,  $k_d$  and  $K_D$  were compared and can be found in Table S2.

**Table S2.** Kinetic constants for small study of native GDF15 from different sources, s. Figure 5. Section 4.3; Kinetic constants represent means of N = 3 donors; except for healthy control, N=1. Individual donor constants were determined as technical duplicates. SD - represents Standard deviation.

| GDF15 Origin   | $k_a$<br>[M <sup>-1</sup> s <sup>-1</sup> ] | $\pm$ SD( $k_a$ )<br>[M <sup>-1</sup> s <sup>-1</sup> ] | $k_d$<br>[s <sup>-1</sup> ] | $\pm$ SD( $k_d$ )<br>[s <sup>-1</sup> ] | $K_D$<br>[nM] | $\pm$ SD ( $K_D$ )<br>[nM] |
|----------------|---------------------------------------------|---------------------------------------------------------|-----------------------------|-----------------------------------------|---------------|----------------------------|
| recombinant    | $2.9 \times 10^5$                           | $2.9 \times 10^4$                                       | $3.5 \times 10^{-02}$       | $3.2 \times 10^{-03}$                   | 119           | 12                         |
| healthy        | $3.0 \times 10^5$                           | -                                                       | $2.6 \times 10^{-02}$       | -                                       | 89            | -                          |
| oncological    | $2.6 \times 10^5$                           | $6.9 \times 10^4$                                       | $3.9 \times 10^{-02}$       | $1.9 \times 10^{-03}$                   | 158           | 38                         |
| cardiovascular | $2.6 \times 10^5$                           | $4.1 \times 10^4$                                       | $3.8 \times 10^{-02}$       | $2.2 \times 10^{-03}$                   | 150           | 21                         |
| pregnant       | $3.2 \times 10^5$                           | $8.2 \times 10^4$                                       | $3.7 \times 10^{-02}$       | $4.9 \times 10^{-03}$                   | 127           | 45                         |
